# Supplementary material for: Dynamic balance in patients with degenerative lumbar spinal stenosis; a cross-sectional study
Source: PubMed Central journal article supplement (PMC6003037; doi:10.1186/s12891-018-2111-x), 2018-06-15
Supplement: 12891_2018_2111_MOESM1_ESM.pdf [file 12891_2018_2111_MOESM1_ESM.pdf]

| Variables                                   | All patients (N=62) |          |        | Group 2 (n=19) |          |        | Group 1 (n=29) |          |        | Group 0 (n=14) |          |        |
|---------------------------------------------|---------------------|----------|--------|----------------|----------|--------|----------------|----------|--------|----------------|----------|--------|
|                                             | *Poor               | Moderate | Normal | Poor           | Moderate | Normal | Poor           | Moderate | Normal | Poor           | Moderate | Normal |
| <b>I. Anticipatory Adjustment</b>           |                     |          |        |                |          |        |                |          |        |                |          |        |
| 1.Sit-to-stand                              | 0                   | 1        | 61     | 0              | 0        | 19     | 0              | 1        | 18     | 0              | 0        | 14     |
| 2.Rise-to-toes                              | 9                   | 23       | 30     | 6              | 6        | 7      | 3              | 12       | 14     | 0              | 5        | 9      |
| 3.Stand on one leg, timed to 20s            | 9                   | 36       | 17     | 7              | 10       | 2      | 1              | 20       | 8      | 1              | 6        | 7      |
| <b>II. Reactive Response</b>                |                     |          |        |                |          |        |                |          |        |                |          |        |
| 4.Compensatory stepping correction forward  | 3                   | 20       | 39     | 2              | 6        | 11     | 1              | 9        | 19     | 0              | 5        | 9      |
| 5.Compensatory stepping correction backward | 5                   | 29       | 28     | 2              | 10       | 7      | 3              | 11       | 15     | 0              | 8        | 6      |
| 6.Compensatory stepping correction lateral  | 6                   | 26       | 30     | 2              | 13       | 4      | 3              | 8        | 18     | 1              | 5        | 8      |
| <b>III. Sensory Orientation</b>             |                     |          |        |                |          |        |                |          |        |                |          |        |
| 7.Stance on firm surface, eyes open         | 0                   | 1        | 61     | 0              | 1        | 18     | 0              | 0        | 29     | 0              | 0        | 14     |
| 8.Stance on foam, eyes closed               | 4                   | 14       | 44     | 3              | 8        | 8      | 1              | 5        | 23     | 0              | 1        | 13     |
| 9.Stance on incline, eyes closed            | 1                   | 4        | 57     | 1              | 3        | 15     | 0              | 1        | 28     | 0              | 0        | 14     |
| <b>IV. Stability in Gait</b>                |                     |          |        |                |          |        |                |          |        |                |          |        |
| 10.Change in gait speed                     | 0                   | 3        | 59     | 0              | 1        | 18     | 0              | 1        | 28     | 0              | 1        | 13     |

|                                      |   |    |    |   |    |    |   |    |    |   |    |    |
|--------------------------------------|---|----|----|---|----|----|---|----|----|---|----|----|
| 11. Walk with head turns, horizontal | 2 | 14 | 46 | 1 | 8  | 10 | 1 | 4  | 24 | 0 | 2  | 12 |
| 12. Walk with pivot turns            | 0 | 13 | 49 | 0 | 9  | 10 | 0 | 3  | 26 | 0 | 1  | 13 |
| 13. Step over obstacles              | 0 | 4  | 58 | 0 | 1  | 18 | 0 | 1  | 28 | 0 | 2  | 12 |
| 14. Time Up Go, dual task            | 6 | 46 | 10 | 3 | 11 | 5  | 3 | 23 | 3  | 0 | 12 | 2  |
